# Supplementary material
Source: PubMed Central journal article supplement (PMC6345506)
Supplement: NIHMS1510935-supplement-1.pdf [file NIHMS1510935-supplement-1.pdf]

## Supplemental Figure 1

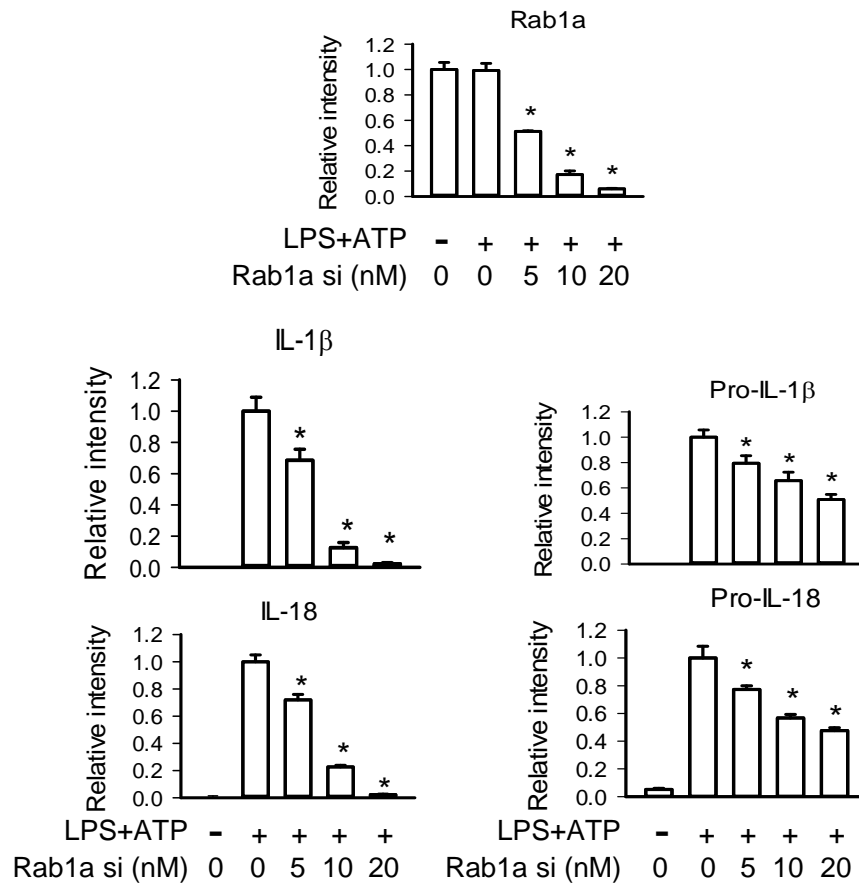

**Supplemental Figure 1. Depletion of Rab1a abolishes release of IL-1 $\beta$  and IL-18 in macrophages.** Densitometric analysis of Rab1a, IL-1 $\beta$  (p17), IL-18, pro-IL-1 $\beta$ , and pro-IL-18 as shown in Fig 1A. The density of proteins in each control (LPS+ATP) group was used as a standard (1 arbitrary unit) to compare relative densities in the other groups.  $n = 3$ . \* $p < 0.05$ , vs. control groups (LPS+ATP), Mann-Whitney test.

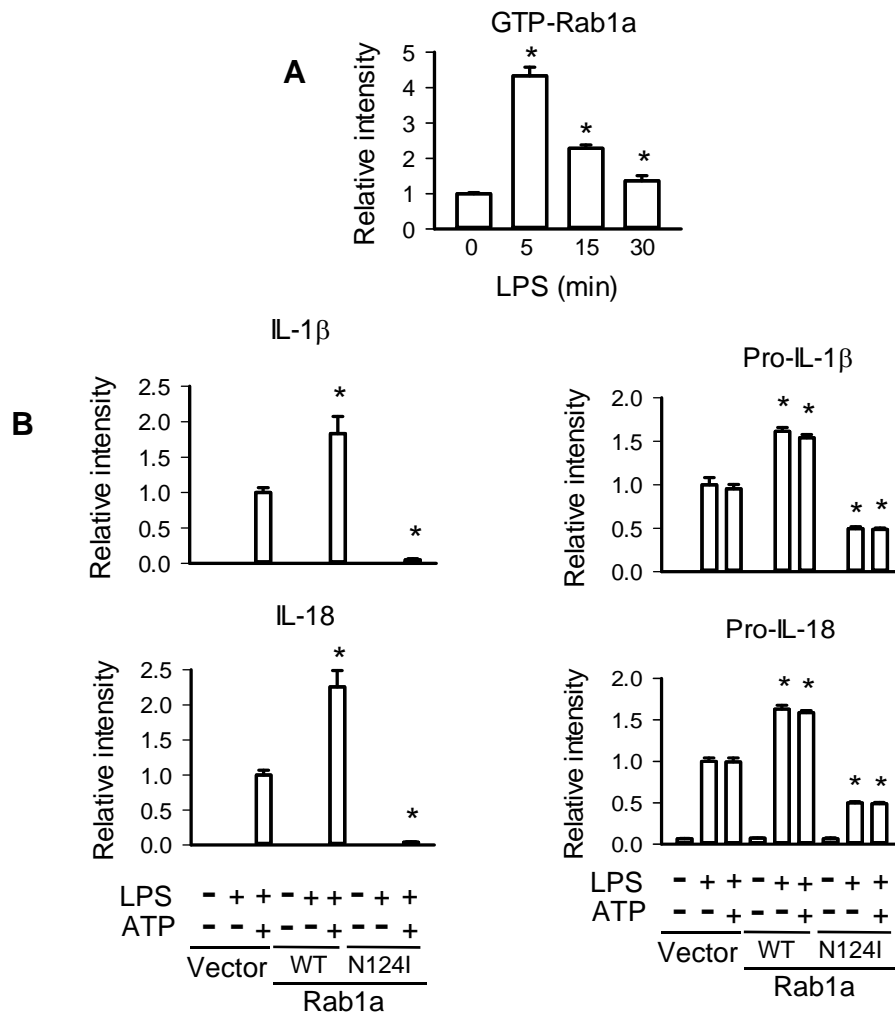

**Supplemental Figure 2. Inactivation of Rab1a prevents release of IL-1 $\beta$  and IL-18 in macrophages.** (A) Densitometric analysis of GTP-Rab1a as shown in Fig 2A. The density of proteins in control (without LPS) group was used as a standard (1 arbitrary unit) to compare relative densities in the other groups.  $n = 3$ . \* $p < 0.05$ , vs. control (without LPS) group, Mann-Whitney test. (B) Densitometric analysis of IL-1 $\beta$  (p17), IL-18, pro-IL-1 $\beta$ , and pro-IL-18 as shown in Fig 2B. The density of proteins in vector (LPS+ATP) group was used as a standard (1 arbitrary unit) to compare relative densities in the other groups.  $n = 3$ . \* $p < 0.05$ , vs. Vector (LPS+ATP) group, Mann-Whitney test.

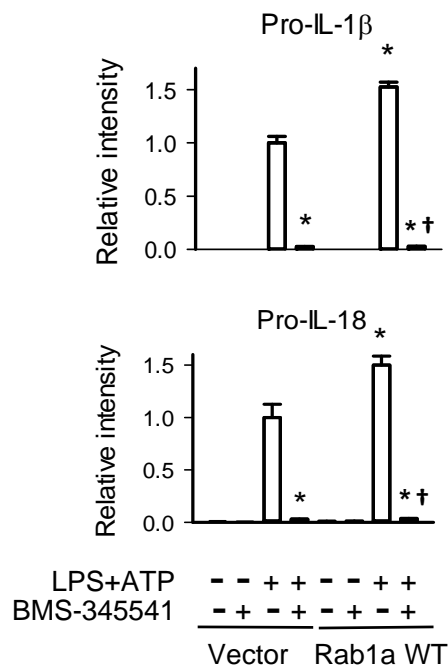

**Supplemental Figure 3. Inhibition of NF- $\kappa$ B activation blocks Rab1a-induced production of pro-IL-1 $\beta$  and pro-IL-18.** Densitometric analysis of pro-IL-1 $\beta$  and pro-IL-18 as shown in Fig 3B. The density of proteins in vector control (LPS) group was used as a standard (1 arbitrary unit) to compare relative densities in the other groups.  $n = 3$ . \* $p < 0.05$ , vs. vector control (LPS) group; † $p < 0.05$ , vs. LPS+ATP group (Rab1a WT), Mann-Whitney test.

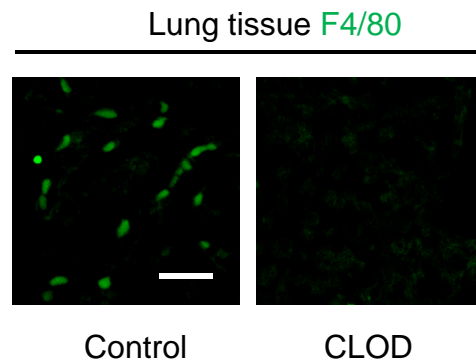

**Supplemental Figure 4. Photomicrographs showing depletion of macrophages in the lung.** The clodronate liposome (CLOD) was intratracheally delivered to the anesthetized mice. After 2d, lungs were harvested and frozen sections (8  $\mu\text{m}$ ) incubated with F4/80 antibody overnight and then with Alexa Fluor488-conjugated secondary antibody for 2 h. Photomicrographs were obtained with a Nikon Eclipse E400 microscope with a 20 $\times$  objective. Scale bar = 20  $\mu\text{m}$ .
